# Supplementary material for: Plasma proteomic profiles in diverse populations identify biomarkers predicting metabolic dysfunction-associated steatotic liver disease up to 16 years before onset
Source: Research Square preprint supplement (doi:10.21203/rs.3.rs-6405995/v1), 2025-04-23
Supplement: Supplementary file 1 [file 3a419e73afe7b2e4d5622cf9.docx]

**Table 1A. Baseline characteristics of participants in the Southern UK cohort and the Northern UK cohort**

| **Participants' characteristics** | **Overall** | **the Southern UK cohort** | **the Northern UK cohort** | ***P* value** |
| --- | --- | --- | --- | --- |
| **N = 52,952** | **N = 37,966** | **N = 14.986** |
| **Age, years** | 58.00 [50.00, 64.00] | 58.00 [50.00, 64.00] | 58.00 [50.00, 64.00] | 0.014 |
| **Sex** |  |  |  | 0.187 |
| Female | 28562 (53.9%) | 20410 (53.8%) | 8125 (54.4%) |  |
| Male | 24390 (46.1%) | 17556 (46.2%) | 6834 (45.6%) |  |
| **MASLD** | 782 (1.5%) | 572 (1.5%) | 210 (1.4%) | 0.387 |
| **Ethnicity** |  |  |  | < 0.001 |
| Non-white | 3349 (6.3%) | 2976 (7.8%) | 373 (2.5%) |  |
| White | 49603 (93.7%) | 34990 (92.2%) | 14613 (97.5%) |  |
| **Education level** |  |  |  | < 0.001 |
| College | 35749 (67.5%) | 25313 (66.7%) | 10436 (69.6%) |  |
| No college | 17203 (32.5%) | 12653 (33.3%) | 4550 (30.4%) |  |
| **Smoking status** |  |  |  | 0.116 |
| Never smoker | 28760 (54.3%) | 20565 (54.2%) | 8195 (54.7%) |  |
| Previous smoker | 18544 (35.0%) | 13391 (35.3%) | 5153 (34.4%) |  |
| Current smoker | 5648 (10.7%) | 4010 (10.6%) | 1638 (10.9%) |  |
| **Alcohol** |  |  |  | < 0.001 |
| Daily or almost daily | 10708 (20.2%) | 7927 (20.9%) | 2781 (18.6%) |  |
| Three or four times a week | 11921 (22.5%) | 8408 (22.1%) | 3513 (23.4%) |  |
| Once or twice a week | 13728 (25.9%) | 9598 (25.3%) | 4130 (27.6%) |  |
| One to three times a month | 5780 (10.9%) | 4049 (10.7%) | 1731 (11.6%) |  |
| Special occasions only or never | 6242 (11.8%) | 4596 (12.1%) | 1646 (11.0%) |  |
| Never | 4573 (8.6%) | 3388 (8.9%) | 1185 (7.9%) |  |
| **Family income** |  |  |  | < 0.001 |
| < £51,999 | 40144 (75.8%) | 28545 (75.2%) | 11599 (77.4%) |  |
| £52,000-£100,000 | 10044 (19.0%) | 7311 (19.3%) | 2733 (18.2%) |  |
| > £100,000 | 2764 (5.2%) | 2110 (5.6%) | 654 (4.4%) |  |
| **TD index** | -2.05 [-3.62, 0.77] | -1.19 [-3.60, 0.84] | -2.19 [-3.68, 0.58] | < 0.001 |
| **Healthy diet** |  |  |  | < 0.001 |
| Poor diet | 33066 (62.4%) | 23529 (62.0%) | 9537 (63.6%) |  |
| Healthy diet | 19886 (37.6%) | 14437 (38.0%) | 5449 (36.4%) |  |
| **Activity, mins/week1** |  |  |  | 0.001 |
| ＜150 | 10081 (19.0%) | 7367 (19.4%) | 2714 (18.1%) |  |
| ≥150 | 42871 (81.0%) | 30599 (80.6%) | 12272 (81.9%) |  |
| **Comorbidities** |  |  |  |  |
| Diabetes | 4988 (9.4%) | 3650 (9.6%) | 1338 (8.9%) | 0.016 |
| Hypertension | 17782 (33.6%) | 13040 (34.3%) | 4742 (31.6%) | < 0.001 |
| **BMI** | 26.78 [24.18, 29.92] | 26.75 [24.12, 29.90] | 26.88 [24.36, 29.97] | < 0.001 |

Continuous data are presented as median [interquartile range] and categorical variables as number (percentage). Participants from the southern recruitment centers in the United Kingdom (Glasgow, Edinburgh, Newcastle, Middlesborough and Leeds) are divided into the Southern UK cohort. Participants from the northern recruitment centers in the United Kingdom (Glasgow, Edinburgh, Newcastle, Middlesborough and Leeds) are divided into the Northern UK cohort. Differences between the Southern UK cohort and the Northern UK cohort were compared using Student’s t-test for continuous variables and Pearson’s chi-squared test for discrete variables. BMI: body mass index; TD index: Townsend Deprivation Index.

1The boundary of exercise duration per week is based on WHO’s recommendation.
