# Supplementary material for: Plasma proteomic profiles in diverse populations identify biomarkers predicting metabolic dysfunction-associated steatotic liver disease up to 16 years before onset
Source: Research Square preprint supplement (doi:10.21203/rs.3.rs-6405995/v1), 2025-04-23
Supplement: Supplementary file 2 [file ba73833743e5cf93fb1465c1.docx]

**Table 1B. Baseline characteristics of participants in the** **Southern China Inception cohort**

| **Participants' characteristics** | **Overall** | **Without MASLD** | **Incident MASLD** | ***P* value** |
| --- | --- | --- | --- | --- |
| **N = 100** | **N = 59** | **N = 41** |
| **Age, years** | 54.00 [39.75, 63.25] | 57.00 [39.50, 65.50] | 52.00 [40.00, 62.00] | 0.242 |
| **Sex** |  |  |  | 0.375 |
| Female | 48 (48.0%) | 31 (52.5%) | 17 (41.5%) |  |
| Male | 52 (52.0%) | 28 (47.5%) | 24 (58.5%) |  |
| **BMI** | 23.63 [21.60, 26.04] | 22.89 [20.06, 24.67] | 24.56 [22.91, 26.67] | 0.002 |
| **Ethnicity** |  |  |  | 0.176 |
| Chinese Han | 95 (99.0%) | 58 (98.3%) | 41 (100.0%) |  |
| Other ethnic groups | 1 (1.0%) | 1 (1.7%) | 0 (0.0%) |  |
| **Smoking status** |  |  |  | 0.107 |
| Never smoker | 78 (78.0%) | 50 (84.7%) | 28 (68.3%) |  |
| Previous smoker | 7 (7.0%) | 2 (3.4%) | 5 (12.2%) |  |
| Current smoker | 15 (15.0%) | 7 (11.9%) | 8 (19.5%) |  |
| **Alcohol** |  |  |  | 0.661 |
| Daily or almost daily | 3 (3.0%) | 2 (3.4%) | 1 (2.4%) |  |
| Three or four times a week | 2 (2.0%) | 1 (1.7%) | 1 (2.4%) |  |
| Once or twice a week | 0 (0.0%) | 0 (0.0%) | 0 (0.0%) |  |
| One to three times a month | 0 (0.0%) | 0 (0.0%) | 0 (0.0%) |  |
| Special occasions only or never | 1 (1.0%) | 0 (0.0%) | 1 (2.4%) |  |
| Never | 94 (94.0%) | 56 (94.9%) | 38 (92.7%) |  |
| **Comorbidities** |  |  |  |  |
| Diabetes | 12 (12.0%) | 8 (13.6%) | 4 (9.8%) | 0.793 |
| Hypertension | 32 (32.0%) | 17 (28.8%) | 15 (36.6%) | 0.548 |

Continuous data are presented as median [interquartile range] and categorical variables as number (percentage). Participants from The Third Affiliated Hospital of Sun Yat-sen University, the southern China, were divided into MASLD cohort and without MASLD cohort. Differences between the two cohorts were compared using Student’s t-test for continuous variables and Pearson’s chi-squared test for discrete variables. BMI: body mass index.
